# Supplementary material
Source: PubMed Central journal article supplement (PMC10107675)

S1

HeLa

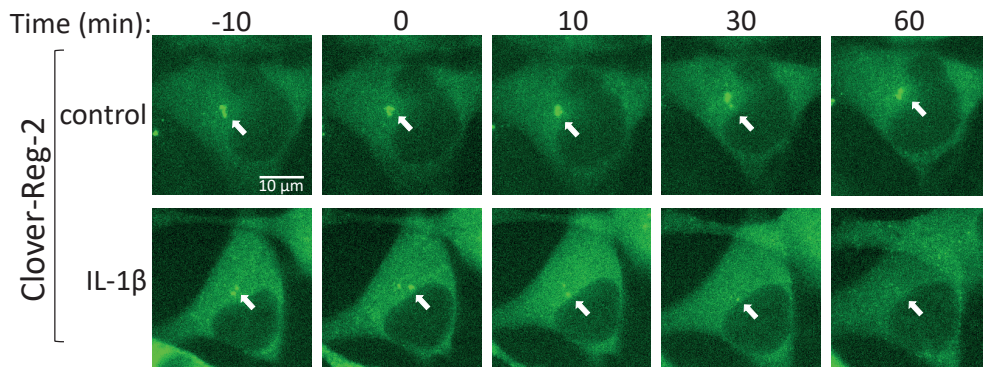

S2

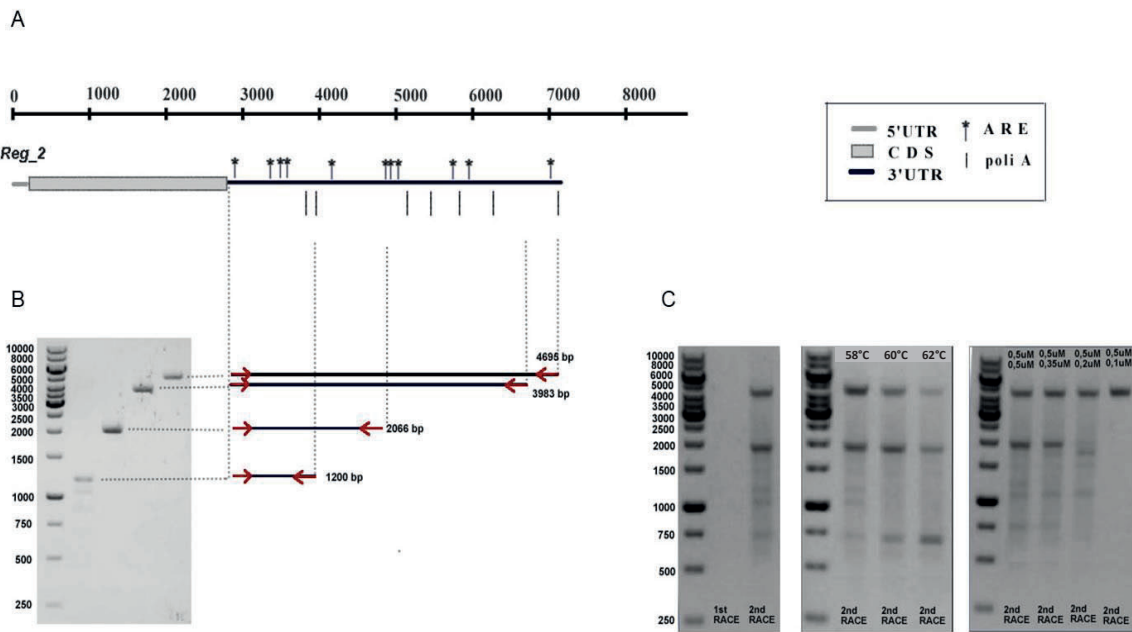

Supplement: FSB2-37-0-s002.pdf [file FSB2-37-0-s002.pdf]
